# Supplementary material for: Validity and Reliability of the Polish Adaptation of the CHAMPS Physical Activity Questionnaire
Source: Hindawi journal article supplement (doi:10.1155/2019/6187616), 2019-03-28
Supplement: f1 [file 6187616.f1.zip]

# CHAMPS - KWESTIONARIUSZ AKTYWNOŚCI DLA OSÓB STARSZYCH W POLSKIEJ ADAPTACJI

Oryginalna wersja:

CHAMPS: Community Healthy Activities Model Program for Seniors

Institute for Health & Aging, Center for Healthy and Active Aging

University of California, San Francisco

Stanford Center for Research in Disease Prevention, Stanford University

Data: \_\_\_\_\_

Nazwisko lub ID: \_\_\_\_\_

Ten kwestionariusz dotyczy aktywności, które mógł/a Pan/i podejmować w ciągu ostatnich 4 tygodni. Pytania na kolejnych stronach są podobne do poniższego przykładu.

## INSTRUKCJA

Jeśli PODEJMOWAŁ/A Pan/i określoną aktywność w ciągu ostatnich 4 tygodni:

**Krok nr 1** Proszę wybrać odpowiedź tak.

**Krok nr 2** Proszę pomyśleć, ile RAZY w ciągu tygodnia zwykle podejmował/a Pan/i tę aktywność, a następnie wpisać odpowiedź w wyznaczonym miejscu.

**Krok nr 3** Proszę zaznaczyć, ile **GODZIN OGÓLEM** poświęcał/a Pan/i na tę aktywność w ciągu typowego tygodnia.

Poniżej przedstawiono przykład odpowiedzi, jaką mogła udzielić Pani Kowalska na Pytanie nr 1:

Pani Kowalska zwykle odwiedza swoje znajome, Marię i Olgę, dwa razy w tygodniu. Zwykle spędza u Marii 1 godzinę w poniedziałek, a w środę przebywa przez 2 godziny u Olgi. Zatem ogółem pani Kowalska poświęca na spotkania ze znajomymi 3 godziny tygodniowo.

|                                                                                                                                                                                                             |                                                                       |                   |             |                    |             |             |                  |  |
|-------------------------------------------------------------------------------------------------------------------------------------------------------------------------------------------------------------|-----------------------------------------------------------------------|-------------------|-------------|--------------------|-------------|-------------|------------------|--|
| Czy w ciągu typowego tygodnia podczas ostatnich 4 tygodni...                                                                                                                                                |                                                                       |                   |             |                    |             |             |                  |  |
| 1. Odwiedzał/a Pan/i znajomych lub krewnych (z wyłączeniem tych, z którymi Pan/i mieszka)?<br><input checked="" type="checkbox"/> TAK Ile razy w ciągu tygodnia? <u>2</u> →<br><input type="checkbox"/> NIE | Ile OGÓLEM <u>godzin w tygodniu</u> zwykle poświęcał/a Pan/i na to? → | Mniej niż 1 godz. | 1-2,5 godz. | <b>3-4,5 godz.</b> | 5-6,5 godz. | 7-8,5 godz. | 9 i więcej godz. |  |

Jeśli NIE PODEJMOWAŁ/A Pan/i danej aktywności:

- Proszę zaznaczyć odpowiedź NIE i przejść do kolejnego pytania

|                                                                                                                                                                                              |                                                                       |                   |             |             |             |             |                  |  |
|----------------------------------------------------------------------------------------------------------------------------------------------------------------------------------------------|-----------------------------------------------------------------------|-------------------|-------------|-------------|-------------|-------------|------------------|--|
| Czy w ciągu typowego tygodnia podczas ostatnich 4 tygodni...                                                                                                                                 |                                                                       |                   |             |             |             |             |                  |  |
| 1. Odwiedzał/a Pan/i znajomych lub krewnych (z wyłączeniem tych, z którymi Pan/i mieszka)?<br><input type="checkbox"/> TAK Ile razy w ciągu tygodnia? ____ →<br><input type="checkbox"/> NIE | Ile OGÓLEM <u>godzin w tygodniu</u> zwykle poświęcał/a Pan/i na to? → | Mniej niż 1 godz. | 1-2,5 godz. | 3-4,5 godz. | 5-6,5 godz. | 7-8,5 godz. | 9 i więcej godz. |  |
| 2. Była Pan/i w ośrodku dla seniorów?<br><input type="checkbox"/> TAK Ile razy w ciągu tygodnia? ____ →<br><input type="checkbox"/> NIE                                                      | Ile OGÓLEM <u>godzin w tygodniu</u> zwykle poświęcał/a Pan/i na to? → | Mniej niż 1 godz. | 1-2,5 godz. | 3-4,5 godz. | 5-6,5 godz. | 7-8,5 godz. | 9 i więcej godz. |  |
| 3. Wykonywał/a Pan/i prace społeczne (wolontariat)?<br><input type="checkbox"/> TAK Ile razy w ciągu tygodnia? ____ →<br><input type="checkbox"/> NIE                                        | Ile OGÓLEM <u>godzin w tygodniu</u> zwykle poświęcał/a Pan/i na to? → | Mniej niż 1 godz. | 1-2,5 godz. | 3-4,5 godz. | 5-6,5 godz. | 7-8,5 godz. | 9 i więcej godz. |  |

|                                                                                                                                                                                                                                                     |                                                                                                                                                                                       |
|-----------------------------------------------------------------------------------------------------------------------------------------------------------------------------------------------------------------------------------------------------|---------------------------------------------------------------------------------------------------------------------------------------------------------------------------------------|
| <p>4. Był/a Pan/i w kościele lub uczestniczył/a Pan/i w pracach kościelnych?</p> <p><input type="checkbox"/> TAK Ile razy w ciągu tygodnia? ____ ➔</p> <p><input type="checkbox"/> NIE</p>                                                          | <p>Ile OGÓŁEM <u>godzin w tygodniu</u> zwykle poświęcał/a Pan/i na to? ➔</p> <p>Mniej niż 1 godz.    1-2,5 godz.    3-4,5 godz.    5-6,5 godz.    7-8,5 godz.    9 i więcej godz.</p> |
| <p>5. Był/a Pan/i na spotkaniu jakiegoś klubu lub grupy?</p> <p><input type="checkbox"/> TAK Ile razy w ciągu tygodnia? ____ ➔</p> <p><input type="checkbox"/> NIE</p>                                                                              | <p>Ile OGÓŁEM <u>godzin w tygodniu</u> zwykle poświęcał/a Pan/i na to? ➔</p> <p>Mniej niż 1 godz.    1-2,5 godz.    3-4,5 godz.    5-6,5 godz.    7-8,5 godz.    9 i więcej godz.</p> |
| <p>6. Używał/a Pan/i komputera?</p> <p><input type="checkbox"/> TAK Ile razy w ciągu tygodnia? ____ ➔</p> <p><input type="checkbox"/> NIE</p>                                                                                                       | <p>Ile <u>godzin w tygodniu</u> OGÓŁEM zwykle Pan/i poświęcał/a na to?</p> <p>Mniej niż 1 godz.    1-2,5 godz.    3-4,5 godz.    5-6,5 godz.    7-8,5 godz.    9 i więcej godz.</p>   |
| <p>7. Tańczył/a Pan/i (tj. taniec w parach, w grupie, taniec ludowy, towarzyski) (<u>z wyłączeniem</u> aerobiku tanecznego)?</p> <p><input type="checkbox"/> TAK Ile razy w ciągu tygodnia? ____ ➔</p> <p><input type="checkbox"/> NIE</p>          | <p>Ile OGÓŁEM <u>godzin w tygodniu</u> zwykle poświęcał/a Pan/i na to? ➔</p> <p>Mniej niż 1 godz.    1-2,5 godz.    3-4,5 godz.    5-6,5 godz.    7-8,5 godz.    9 i więcej godz.</p> |
| <p>8. Zajmował/a się Pan/i stolarką, robótkami ręcznymi, rysowaniem lub inną sztuką czy rzemiosłem?</p> <p><input type="checkbox"/> TAK Ile razy w ciągu tygodnia? ____ ➔</p> <p><input type="checkbox"/> NIE</p>                                   | <p>Ile OGÓŁEM <u>godzin w tygodniu</u> zwykle poświęcał/a Pan/i na to? ➔</p> <p>Mniej niż 1 godz.    1-2,5 godz.    3-4,5 godz.    5-6,5 godz.    7-8,5 godz.    9 i więcej godz.</p> |
| <p>9. Grał/a Pan/i w golfa, nosząc lub ciągnąc swój sprzęt golfowy (proszę policzyć wyłącznie czas przeznaczony na <u>chodzenie</u>)?</p> <p><input type="checkbox"/> TAK Ile razy w ciągu tygodnia? ____ ➔</p> <p><input type="checkbox"/> NIE</p> | <p>Ile OGÓŁEM <u>godzin w tygodniu</u> zwykle poświęcał/a Pan/i na to? ➔</p> <p>Mniej niż 1 godz.    1-2,5 godz.    3-4,5 godz.    5-6,5 godz.    7-8,5 godz.    9 i więcej godz.</p> |
| <p>10. Grał/a Pan/i w golfa, jeżdżąc wózkem golfowym (proszę policzyć wyłącznie czas przeznaczony na <u>chodzenie</u>)?</p> <p><input type="checkbox"/> TAK Ile razy w ciągu tygodnia? ____ ➔</p> <p><input type="checkbox"/> NIE</p>               | <p>Ile OGÓŁEM <u>godzin w tygodniu</u> zwykle poświęcał/a Pan/i na to? ➔</p> <p>Mniej niż 1 godz.    1-2,5 godz.    3-4,5 godz.    5-6,5 godz.    7-8,5 godz.    9 i więcej godz.</p> |
| <p>11. Był/a Pan/i na koncercie, filmie, wykładzie lub wydarzeniu sportowym?</p> <p><input type="checkbox"/> TAK Ile razy w ciągu tygodnia? ____ ➔</p> <p><input type="checkbox"/> NIE</p>                                                          | <p>Ile OGÓŁEM <u>godzin w tygodniu</u> zwykle poświęcał/a Pan/i na to? ➔</p> <p>Mniej niż 1 godz.    1-2,5 godz.    3-4,5 godz.    5-6,5 godz.    7-8,5 godz.    9 i więcej godz.</p> |
| <p>12. Grał/a Pan/i w karty, bingo lub gry planszowe z innymi osobami?</p> <p><input type="checkbox"/> TAK Ile razy w ciągu tygodnia? ____ ➔</p> <p><input type="checkbox"/> NIE</p>                                                                | <p>Ile OGÓŁEM <u>godzin w tygodniu</u> zwykle poświęcał/a Pan/i na to? ➔</p> <p>Mniej niż 1 godz.    1-2,5 godz.    3-4,5 godz.    5-6,5 godz.    7-8,5 godz.    9 i więcej godz.</p> |
| <p>13. Grał/a Pan/i w bilard?</p> <p><input type="checkbox"/> TAK Ile razy w ciągu tygodnia? ____ ➔</p> <p><input type="checkbox"/> NIE</p>                                                                                                         | <p>Ile OGÓŁEM <u>godzin w tygodniu</u> zwykle poświęcał/a Pan/i na to? ➔</p> <p>Mniej niż 1 godz.    1-2,5 godz.    3-4,5 godz.    5-6,5 godz.    7-8,5 godz.    9 i więcej godz.</p> |

|                                                                                                                                                                                                                   |                                                                                                                                                                                       |
|-------------------------------------------------------------------------------------------------------------------------------------------------------------------------------------------------------------------|---------------------------------------------------------------------------------------------------------------------------------------------------------------------------------------|
| <p>14. Grał/a Pan/i w tenisa w grę pojedynczą (z wyłączeniem gry podwójnej, deblowej)?</p> <p><input type="checkbox"/> TAK Ile razy w ciągu tygodnia? ____ ➔</p> <p><input type="checkbox"/> NIE</p>              | <p>Ile OGÓŁEM <u>godzin w tygodniu</u> zwykle poświęcał/a Pan/i na to? ➔</p> <p>Mniej niż 1 godz.    1-2,5 godz.    3-4,5 godz.    5-6,5 godz.    7-8,5 godz.    9 i więcej godz.</p> |
| <p>15. Grał/a Pan/i w tenisa w grę podwójną (z wyłączeniem gry pojedynczej, singlowej)?</p> <p><input type="checkbox"/> TAK Ile razy w ciągu tygodnia? ____ ➔</p> <p><input type="checkbox"/> NIE</p>             | <p>Ile OGÓŁEM <u>godzin w tygodniu</u> zwykle poświęcał/a Pan/i na to? ➔</p> <p>Mniej niż 1 godz.    1-2,5 godz.    3-4,5 godz.    5-6,5 godz.    7-8,5 godz.    9 i więcej godz.</p> |
| <p>16. Jeździł/a Pan/i na łyżwach, wrotkach, rolkach?</p> <p><input type="checkbox"/> TAK Ile razy w ciągu tygodnia? ____ ➔</p> <p><input type="checkbox"/> NIE</p>                                               | <p>Ile OGÓŁEM <u>godzin w tygodniu</u> zwykle poświęcał/a Pan/i na to? ➔</p> <p>Mniej niż 1 godz.    1-2,5 godz.    3-4,5 godz.    5-6,5 godz.    7-8,5 godz.    9 i więcej godz.</p> |
| <p>17. Grał/a Pan/i na instrumencie muzycznym?</p> <p><input type="checkbox"/> TAK Ile razy w ciągu tygodnia? ____ ➔</p> <p><input type="checkbox"/> NIE</p>                                                      | <p>Ile OGÓŁEM <u>godzin w tygodniu</u> zwykle poświęcał/a Pan/i na to? ➔</p> <p>Mniej niż 1 godz.    1-2,5 godz.    3-4,5 godz.    5-6,5 godz.    7-8,5 godz.    9 i więcej godz.</p> |
| <p>18. Czytał/a Pan/i?</p> <p><input type="checkbox"/> TAK Ile razy w ciągu tygodnia? ____ ➔</p> <p><input type="checkbox"/> NIE</p>                                                                              | <p>Ile OGÓŁEM <u>godzin w tygodniu</u> zwykle poświęcał/a Pan/i na to? ➔</p> <p>Mniej niż 1 godz.    1-2,5 godz.    3-4,5 godz.    5-6,5 godz.    7-8,5 godz.    9 i więcej godz.</p> |
| <p>19. Wykonywał/a Pan/i ciężkie prace domowe (tj. mycie okien, czyszczenie rynien)?</p> <p><input type="checkbox"/> TAK Ile razy w ciągu tygodnia? ____ ➔</p> <p><input type="checkbox"/> NIE</p>                | <p>Ile OGÓŁEM <u>godzin w tygodniu</u> zwykle poświęcał/a Pan/i na to? ➔</p> <p>Mniej niż 1 godz.    1-2,5 godz.    3-4,5 godz.    5-6,5 godz.    7-8,5 godz.    9 i więcej godz.</p> |
| <p>20. Wykonywał/a Pan/i lekkie prace domowe (tj. zamiatanie, odkurzanie)?</p> <p><input type="checkbox"/> TAK Ile razy w ciągu tygodnia? ____ ➔</p> <p><input type="checkbox"/> NIE</p>                          | <p>Ile OGÓŁEM <u>godzin w tygodniu</u> zwykle poświęcał/a Pan/i na to? ➔</p> <p>Mniej niż 1 godz.    1-2,5 godz.    3-4,5 godz.    5-6,5 godz.    7-8,5 godz.    9 i więcej godz.</p> |
| <p>21. Wykonywał/a Pan/i ciężkie prace ogrodowe (tj. kopanie, grabienie)?</p> <p><input type="checkbox"/> TAK Ile razy w ciągu tygodnia? ____ ➔</p> <p><input type="checkbox"/> NIE</p>                           | <p>Ile OGÓŁEM <u>godzin w tygodniu</u> zwykle poświęcał/a Pan/i na to? ➔</p> <p>Mniej niż 1 godz.    1-2,5 godz.    3-4,5 godz.    5-6,5 godz.    7-8,5 godz.    9 i więcej godz.</p> |
| <p>22. Wykonywał/a Pan/i lekkie prace ogrodowe (tj. podlewanie roślin)?</p> <p><input type="checkbox"/> TAK Ile razy w ciągu tygodnia? ____ ➔</p> <p><input type="checkbox"/> NIE</p>                             | <p>Ile OGÓŁEM <u>godzin w tygodniu</u> zwykle poświęcał/a Pan/i na to? ➔</p> <p>Mniej niż 1 godz.    1-2,5 godz.    3-4,5 godz.    5-6,5 godz.    7-8,5 godz.    9 i więcej godz.</p> |
| <p>23. Pracował/a Pan/i przy swoim samochodzie, ciężarówce, kosiarce do trawy lub innym urządzeniu?</p> <p><input type="checkbox"/> TAK Ile razy w ciągu tygodnia? ____ ➔</p> <p><input type="checkbox"/> NIE</p> | <p>Ile OGÓŁEM <u>godzin w tygodniu</u> zwykle poświęcał/a Pan/i na to? ➔</p> <p>Mniej niż 1 godz.    1-2,5 godz.    3-4,5 godz.    5-6,5 godz.    7-8,5 godz.    9 i więcej godz.</p> |
| <p><b>**Uwaga: Odpowiadając na pytania dotyczące biegania i marszu, proszę uwzględnić ćwiczenia na bieżni mechanicznej.</b></p>                                                                                   |                                                                                                                                                                                       |

|                                                                                                                                                                                                                                                                                              |                                                                              |                          |                    |                    |                    |                    |                         |
|----------------------------------------------------------------------------------------------------------------------------------------------------------------------------------------------------------------------------------------------------------------------------------------------|------------------------------------------------------------------------------|--------------------------|--------------------|--------------------|--------------------|--------------------|-------------------------|
| <p>24. Biegał/a Pan/i lub uprawiał/a Pan/i jogging?</p> <p><input type="checkbox"/> TAK Ile razy w ciągu tygodnia? _____ ➔</p> <p><input type="checkbox"/> NIE</p>                                                                                                                           | <p>Ile OGÓŁEM <u>godzin w tygodniu</u> zwykle poświęcał/a Pan/i na to? ➔</p> | <p>Mniej niż 1 godz.</p> | <p>1-2,5 godz.</p> | <p>3-4,5 godz.</p> | <p>5-6,5 godz.</p> | <p>7-8,5 godz.</p> | <p>9 i więcej godz.</p> |
| <p>25. Podchodził/a Pan/i pod górę lub wspinał/a się Pan/i (proszę uwzględnić wyłącznie przemieszczanie się pod górę)?</p> <p><input type="checkbox"/> TAK Ile razy w ciągu tygodnia? _____ ➔</p> <p><input type="checkbox"/> NIE</p>                                                        | <p>Ile OGÓŁEM <u>godzin w tygodniu</u> zwykle poświęcał/a Pan/i na to? ➔</p> | <p>Mniej niż 1 godz.</p> | <p>1-2,5 godz.</p> | <p>3-4,5 godz.</p> | <p>5-6,5 godz.</p> | <p>7-8,5 godz.</p> | <p>9 i więcej godz.</p> |
| <p>26. Spacerował/a Pan/i <u>szybko</u> lub <u>bardzo szybko</u> jako forma ćwiczeń (z <u>wyłączeniem</u> spacerowania w wolnym tempie i wchodzenia pod górę)?</p> <p><input type="checkbox"/> TAK Ile razy w ciągu tygodnia? _____ ➔</p> <p><input type="checkbox"/> NIE</p>                | <p>Ile OGÓŁEM <u>godzin w tygodniu</u> zwykle poświęcał/a Pan/i na to? ➔</p> | <p>Mniej niż 1 godz.</p> | <p>1-2,5 godz.</p> | <p>3-4,5 godz.</p> | <p>5-6,5 godz.</p> | <p>7-8,5 godz.</p> | <p>9 i więcej godz.</p> |
| <p>27. Chodził/a Pan/i w celu załatwienia różnych spraw (tj. po zakupy, odprowadzanie dzieci do/ze szkoły) (proszę uwzględnić wyłącznie czas poświęcony na <u>chodzenie</u>)?</p> <p><input type="checkbox"/> TAK Ile razy w ciągu tygodnia? _____ ➔</p> <p><input type="checkbox"/> NIE</p> | <p>Ile OGÓŁEM <u>godzin w tygodniu</u> zwykle poświęcał/a Pan/i na to? ➔</p> | <p>Mniej niż 1 godz.</p> | <p>1-2,5 godz.</p> | <p>3-4,5 godz.</p> | <p>5-6,5 godz.</p> | <p>7-8,5 godz.</p> | <p>9 i więcej godz.</p> |
| <p>28. Spacerował/a Pan/i <u>w wolnym tempie</u> jako forma ćwiczeń lub dla przyjemności?</p> <p><input type="checkbox"/> TAK Ile razy w ciągu tygodnia? _____ ➔</p> <p><input type="checkbox"/> NIE</p>                                                                                     | <p>Ile OGÓŁEM <u>godzin w tygodniu</u> zwykle poświęcał/a Pan/i na to? ➔</p> | <p>Mniej niż 1 godz.</p> | <p>1-2,5 godz.</p> | <p>3-4,5 godz.</p> | <p>5-6,5 godz.</p> | <p>7-8,5 godz.</p> | <p>9 i więcej godz.</p> |
| <p>29. Jeździł/a Pan/i na rowerze lub na rowerze stacjonarnym?</p> <p><input type="checkbox"/> TAK Ile razy w ciągu tygodnia? _____ ➔</p> <p><input type="checkbox"/> NIE</p>                                                                                                                | <p>Ile OGÓŁEM <u>godzin w tygodniu</u> zwykle poświęcał/a Pan/i na to? ➔</p> | <p>Mniej niż 1 godz.</p> | <p>1-2,5 godz.</p> | <p>3-4,5 godz.</p> | <p>5-6,5 godz.</p> | <p>7-8,5 godz.</p> | <p>9 i więcej godz.</p> |
| <p>30. Ćwiczył/a Pan/i z wykorzystaniem innych urządzeń do treningu tlenowego tj. ergometr, stepper (z <u>wyłączeniem</u> bieżni mechanicznej i roweru stacjonarnego)?</p> <p><input type="checkbox"/> TAK Ile razy w ciągu tygodnia? _____ ➔</p> <p><input type="checkbox"/> NIE</p>        | <p>Ile OGÓŁEM <u>godzin w tygodniu</u> zwykle poświęcał/a Pan/i na to? ➔</p> | <p>Mniej niż 1 godz.</p> | <p>1-2,5 godz.</p> | <p>3-4,5 godz.</p> | <p>5-6,5 godz.</p> | <p>7-8,5 godz.</p> | <p>9 i więcej godz.</p> |
| <p>31. Wykonywał/a Pan/i ćwiczenia w wodzie (z <u>wyłączeniem</u> pływania)?</p> <p><input type="checkbox"/> TAK Ile razy w ciągu tygodnia? _____ ➔</p> <p><input type="checkbox"/> NIE</p>                                                                                                  | <p>Ile OGÓŁEM <u>godzin w tygodniu</u> zwykle poświęcał/a Pan/i na to? ➔</p> | <p>Mniej niż 1 godz.</p> | <p>1-2,5 godz.</p> | <p>3-4,5 godz.</p> | <p>5-6,5 godz.</p> | <p>7-8,5 godz.</p> | <p>9 i więcej godz.</p> |
| <p>32. Pływał/a Pan/i w szybkim lub umiarkowanym tempie?</p> <p><input type="checkbox"/> TAK Ile razy w ciągu tygodnia? _____ ➔</p> <p><input type="checkbox"/> NIE</p>                                                                                                                      | <p>Ile OGÓŁEM <u>godzin w tygodniu</u> zwykle poświęcał/a Pan/i na to? ➔</p> | <p>Mniej niż 1 godz.</p> | <p>1-2,5 godz.</p> | <p>3-4,5 godz.</p> | <p>5-6,5 godz.</p> | <p>7-8,5 godz.</p> | <p>9 i więcej godz.</p> |

|                                                                                                                                                                                                                                                                        |                                                                              |                          |                    |                    |                    |                    |                         |
|------------------------------------------------------------------------------------------------------------------------------------------------------------------------------------------------------------------------------------------------------------------------|------------------------------------------------------------------------------|--------------------------|--------------------|--------------------|--------------------|--------------------|-------------------------|
| <p>33. Pływał/a Pan/i w wolnym tempie?</p> <p><input type="checkbox"/> TAK Ile razy w ciągu tygodnia? ____ ➔</p> <p><input type="checkbox"/> NIE</p>                                                                                                                   | <p>Ile OGÓŁEM <u>godzin w tygodniu</u> zwykle poświęcał/a Pan/i na to? ➔</p> | <p>Mniej niż 1 godz.</p> | <p>1-2,5 godz.</p> | <p>3-4,5 godz.</p> | <p>5-6,5 godz.</p> | <p>7-8,5 godz.</p> | <p>9 i więcej godz.</p> |
| <p>34. Wykonywał/a Pan/i ćwiczenia rozciągające lub ćwiczenia gibkości (proszę nie wliczać Jogi lub Tai-chi)?</p> <p><input type="checkbox"/> TAK Ile razy w ciągu tygodnia? ____ ➔</p> <p><input type="checkbox"/> NIE</p>                                            | <p>Ile OGÓŁEM <u>godzin w tygodniu</u> zwykle poświęcał/a Pan/i na to? ➔</p> | <p>Mniej niż 1 godz.</p> | <p>1-2,5 godz.</p> | <p>3-4,5 godz.</p> | <p>5-6,5 godz.</p> | <p>7-8,5 godz.</p> | <p>9 i więcej godz.</p> |
| <p>35. Ćwiczył/a Pan/i Jogę lub Tai Chi?</p> <p><input type="checkbox"/> TAK Ile razy w ciągu tygodnia? ____ ➔</p> <p><input type="checkbox"/> NIE</p>                                                                                                                 | <p>Ile OGÓŁEM <u>godzin w tygodniu</u> zwykle poświęcał/a Pan/i na to? ➔</p> | <p>Mniej niż 1 godz.</p> | <p>1-2,5 godz.</p> | <p>3-4,5 godz.</p> | <p>5-6,5 godz.</p> | <p>7-8,5 godz.</p> | <p>9 i więcej godz.</p> |
| <p>36. Ćwiczył/a Pan/i aerobik lub aerobik taneczny?</p> <p><input type="checkbox"/> TAK Ile razy w ciągu tygodnia? ____ ➔</p> <p><input type="checkbox"/> NIE</p>                                                                                                     | <p>Ile OGÓŁEM <u>godzin w tygodniu</u> zwykle poświęcał/a Pan/i na to? ➔</p> | <p>Mniej niż 1 godz.</p> | <p>1-2,5 godz.</p> | <p>3-4,5 godz.</p> | <p>5-6,5 godz.</p> | <p>7-8,5 godz.</p> | <p>9 i więcej godz.</p> |
| <p>37. Wykonywał/a Pan/i umiarkowany lub intensywny trening siłowy (tj. ćwiczenia z ciężarkami <u>powyżej 2,5 kg</u>, ćwiczenia na siłowni lub pompki)?</p> <p><input type="checkbox"/> TAK Ile razy w ciągu tygodnia? ____ ➔</p> <p><input type="checkbox"/> NIE</p>  | <p>Ile OGÓŁEM <u>godzin w tygodniu</u> zwykle poświęcał/a Pan/i na to? ➔</p> | <p>Mniej niż 1 godz.</p> | <p>1-2,5 godz.</p> | <p>3-4,5 godz.</p> | <p>5-6,5 godz.</p> | <p>7-8,5 godz.</p> | <p>9 i więcej godz.</p> |
| <p>38. Wykonywał/a Pan/i lekki trening siłowy (tj. ćwiczenia z ciężarkami <u>2,5 kg</u> lub lżejszymi lub ćwiczenia z taśmami elastycznymi)?</p> <p><input type="checkbox"/> TAK Ile razy w ciągu tygodnia? ____ ➔</p> <p><input type="checkbox"/> NIE</p>             | <p>Ile OGÓŁEM <u>godzin w tygodniu</u> zwykle poświęcał/a Pan/i na to? ➔</p> | <p>Mniej niż 1 godz.</p> | <p>1-2,5 godz.</p> | <p>3-4,5 godz.</p> | <p>5-6,5 godz.</p> | <p>7-8,5 godz.</p> | <p>9 i więcej godz.</p> |
| <p>39. Wykonywał/a Pan/i ćwiczenia ogólnorozwojowe, tj. lekkie ćwiczenia gimnastyczne lub ćwiczenia na krześle (<u>z wyłączeniem</u> treningu siłowego)?</p> <p><input type="checkbox"/> TAK Ile razy w ciągu tygodnia? ____ ➔</p> <p><input type="checkbox"/> NIE</p> | <p>Ile OGÓŁEM <u>godzin w tygodniu</u> zwykle poświęcał/a Pan/i na to? ➔</p> | <p>Mniej niż 1 godz.</p> | <p>1-2,5 godz.</p> | <p>3-4,5 godz.</p> | <p>5-6,5 godz.</p> | <p>7-8,5 godz.</p> | <p>9 i więcej godz.</p> |
| <p>40. Grał/a Pan/i w koszykówkę, piłkę nożną, itp. (<u>z wyłączeniem</u> czasu spędzonego poza boiskiem)?</p> <p><input type="checkbox"/> TAK Ile razy w ciągu tygodnia? ____ ➔</p> <p><input type="checkbox"/> NIE</p>                                               | <p>Ile OGÓŁEM <u>godzin w tygodniu</u> zwykle poświęcał/a Pan/i na to? ➔</p> | <p>Mniej niż 1 godz.</p> | <p>1-2,5 godz.</p> | <p>3-4,5 godz.</p> | <p>5-6,5 godz.</p> | <p>7-8,5 godz.</p> | <p>9 i więcej godz.</p> |
| <p>41. Podejmował/a Pan/i inne formy aktywności fizycznej nieuwzględnione powyżej (proszę wymienić)</p> <p>_____</p> <p><input type="checkbox"/> TAK Ile razy w ciągu tygodnia? ____ ➔</p> <p><input type="checkbox"/> NIE</p>                                         | <p>Ile OGÓŁEM <u>godzin w tygodniu</u> zwykle poświęcał/a Pan/i na to? ➔</p> | <p>Mniej niż 1 godz.</p> | <p>1-2,5 godz.</p> | <p>3-4,5 godz.</p> | <p>5-6,5 godz.</p> | <p>7-8,5 godz.</p> | <p>9 i więcej godz.</p> |

*Dziękujemy za wypełnienie ankiety!*
