# Supplementary material for: Validity and Reliability of the Polish Adaptation of the CHAMPS Physical Activity Questionnaire
Source: Biomed Res Int. 2019 Mar 28;2019:6187616. doi: 10.1155/2019/6187616 (PMC6458940; doi:10.1155/2019/6187616)
Supplement: Supplementary Materials — contain Polish version of the CHAMPS physical activity questionnaire. [file 6187616.f1.zip]

Archive with 3 entries (2 files):
- 6187616.f1/
- 6187616.f1/Supplementary materials_BMRI_2704613.doc
- 6187616.f1/Supplementary materials_BMRI_2704614.pdf
